# Supplementary material
Source: PubMed Central journal article supplement (PMC7168458)
Supplement: MIM-59-129-s001.pdf [file MIM-59-129-s001.pdf]

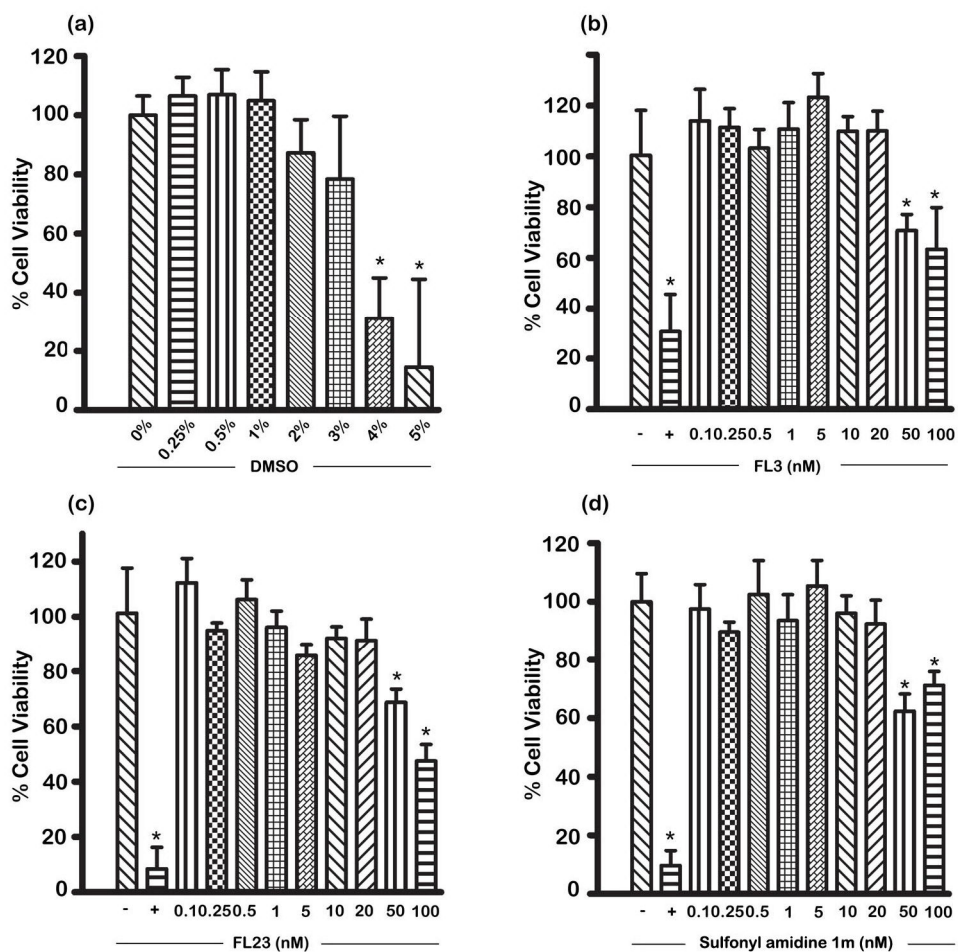

**Supplemental Figure 1.** Determination of cell viability. Hek293T/17 were incubated with different concentrations of (a) DMSO, (b) FL3, (c) FL23 or (d) sulfonyl amidine 1m for 24 hours before determination of cell viability using the MTT assay. Data is derived from 8 replicates, and error bars show S.D. \*P<0.05. -ve (Vehicle/DMEM), + (5% DMSO).

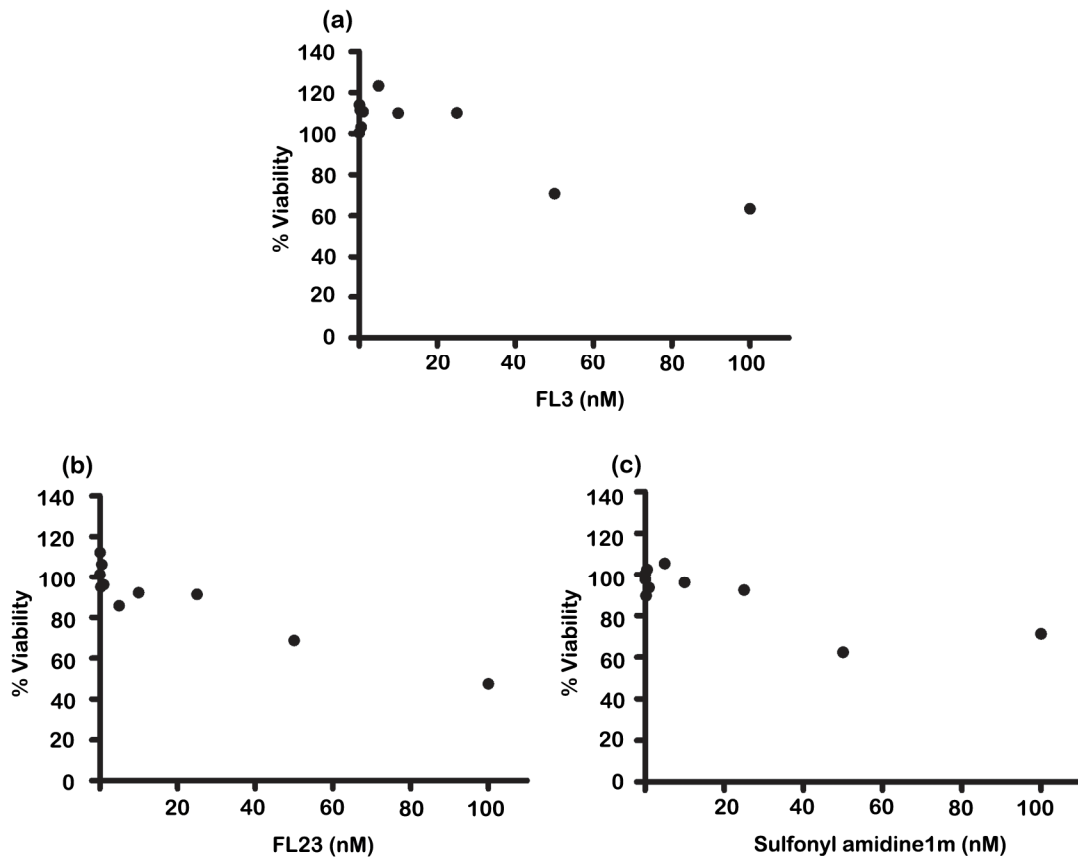

**Supplemental Figure 2.** Dose response curves generated by the ED50plus (v1.0) software used for CC50 calculations.

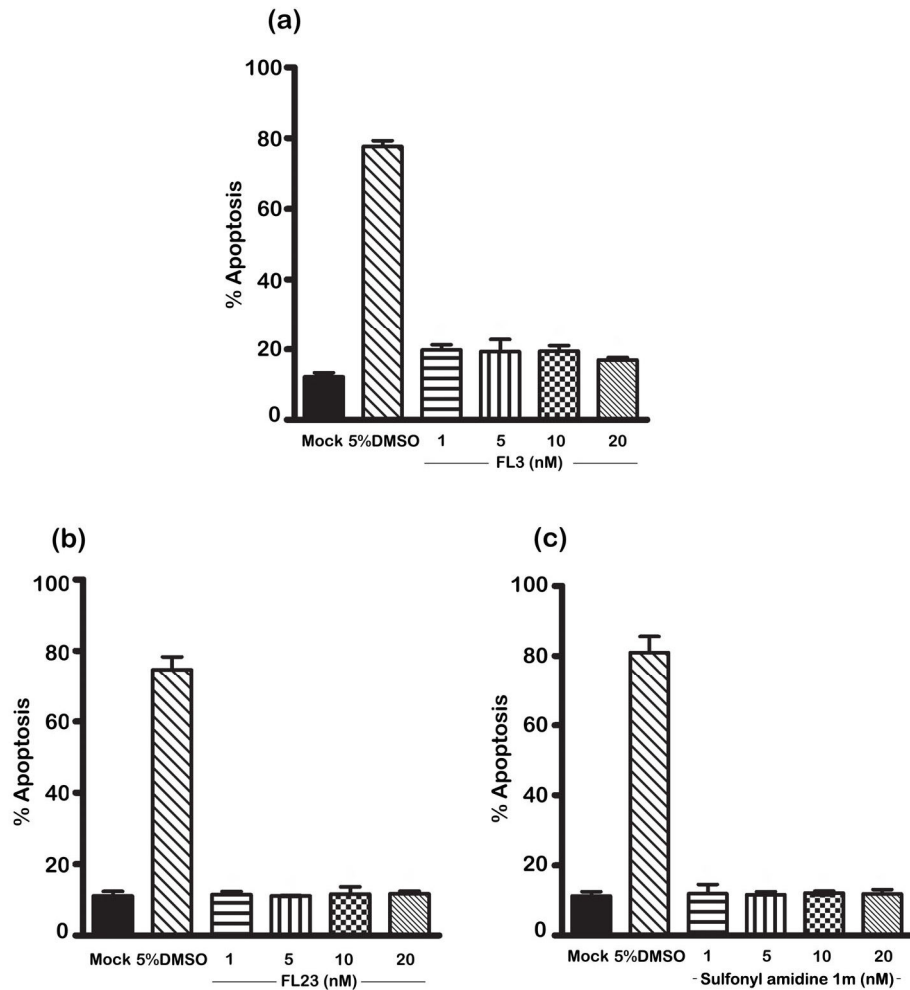

**Supplemental Figure 3.** Analysis of apoptosis in response to flavaglines treatment. Hek293T/17 were incubated with different concentrations of (a) FL3, (b) FL23 or (c) sulfonyl amidine 1m for 24 hours before determination of the level of apoptosis by annexin V/propidium iodide staining and analysis by flow cytometry. Experiments were undertaken independently in triplicate and error bars show S.D. Mock (vehicle/DMEM).

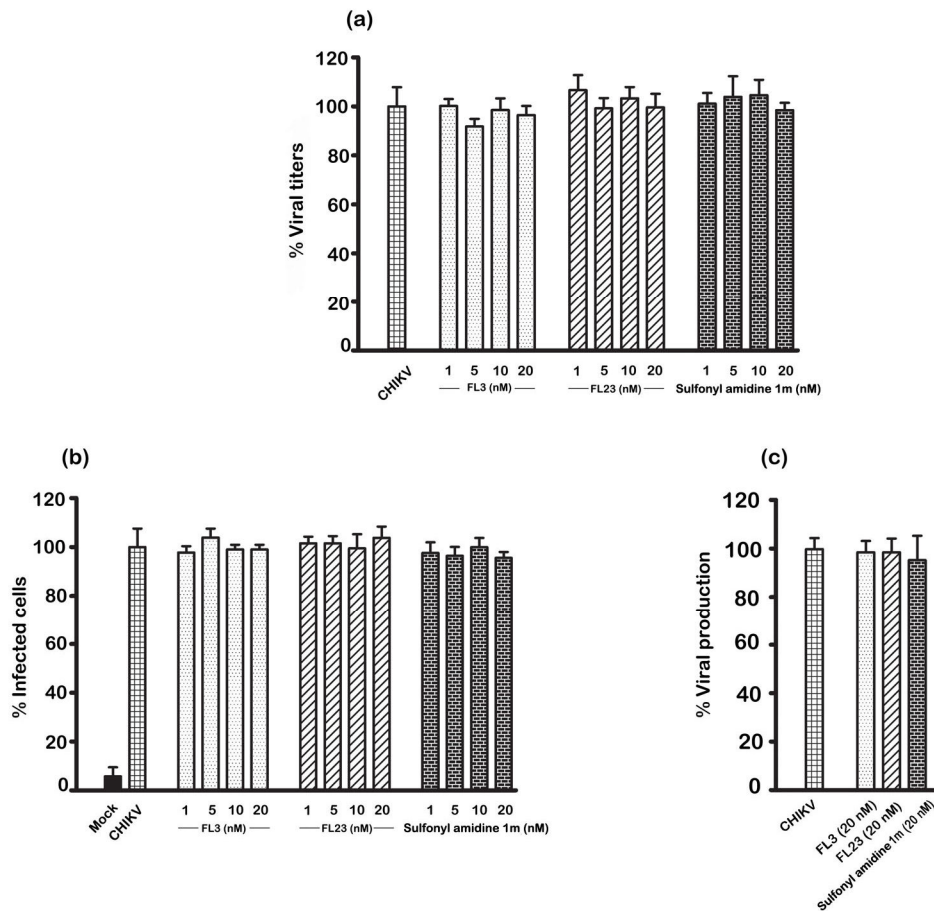

**Supplemental Figure 4.** Analysis of virucidal activity of flavaglines. Stock CHIKV was incubated for 1 hour in the presence or absence of different concentrations of FL3, FL23 and sulfonyl amidine 1m after which the virus was either (a) directly assayed by standard plaque assay or (b) used to infect Hek293T/17 with the percentage infection being determined at 20 hours by flow cytometry. (c) Virus titer in the supernatants from 20nM treatments in (b) were assayed by standard plaque assay. Experiments were undertaken independently in triplicate, with duplicate plaque assay and error bars show S.D. Mock (mock virus incubated with vehicle/DMEM) and CHIKV (CHIKV incubated with vehicle/DMEM).

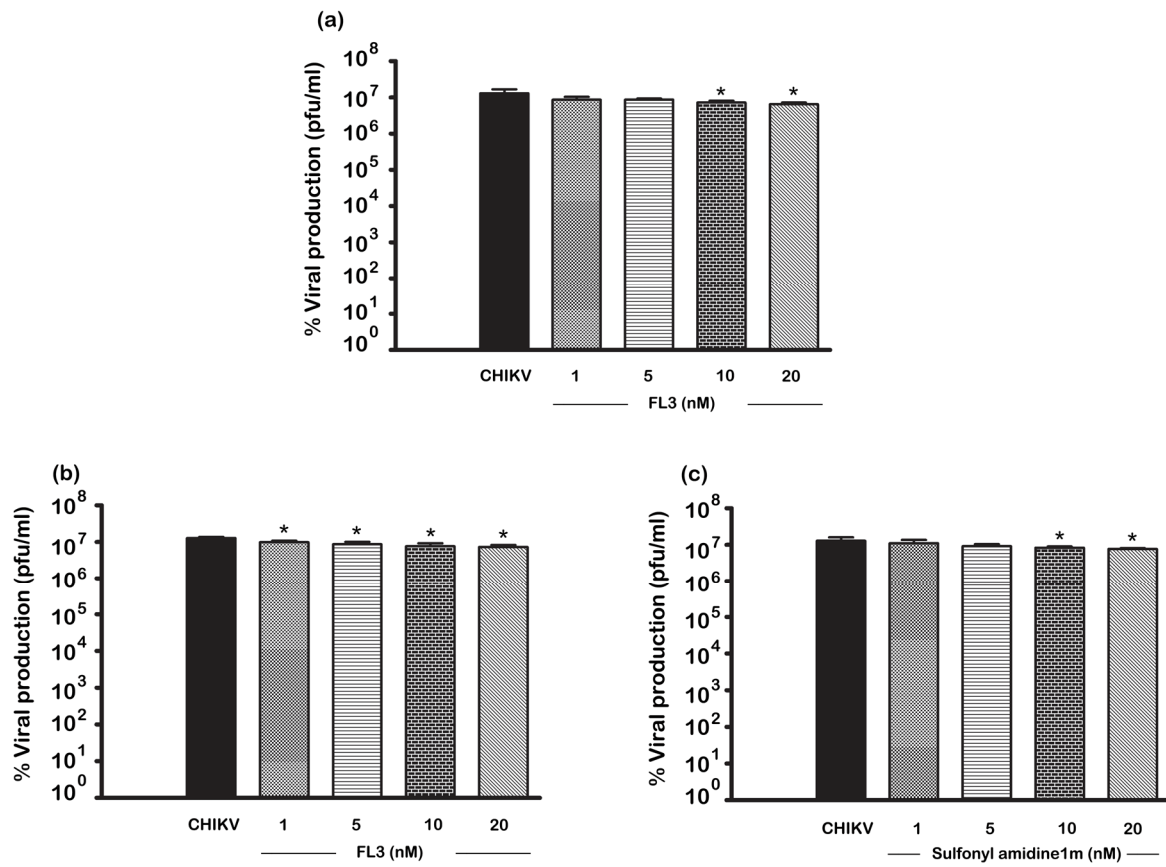

**Supplemental Figure 5.** Virus production data from Figure 3 plotted as pfu/ml

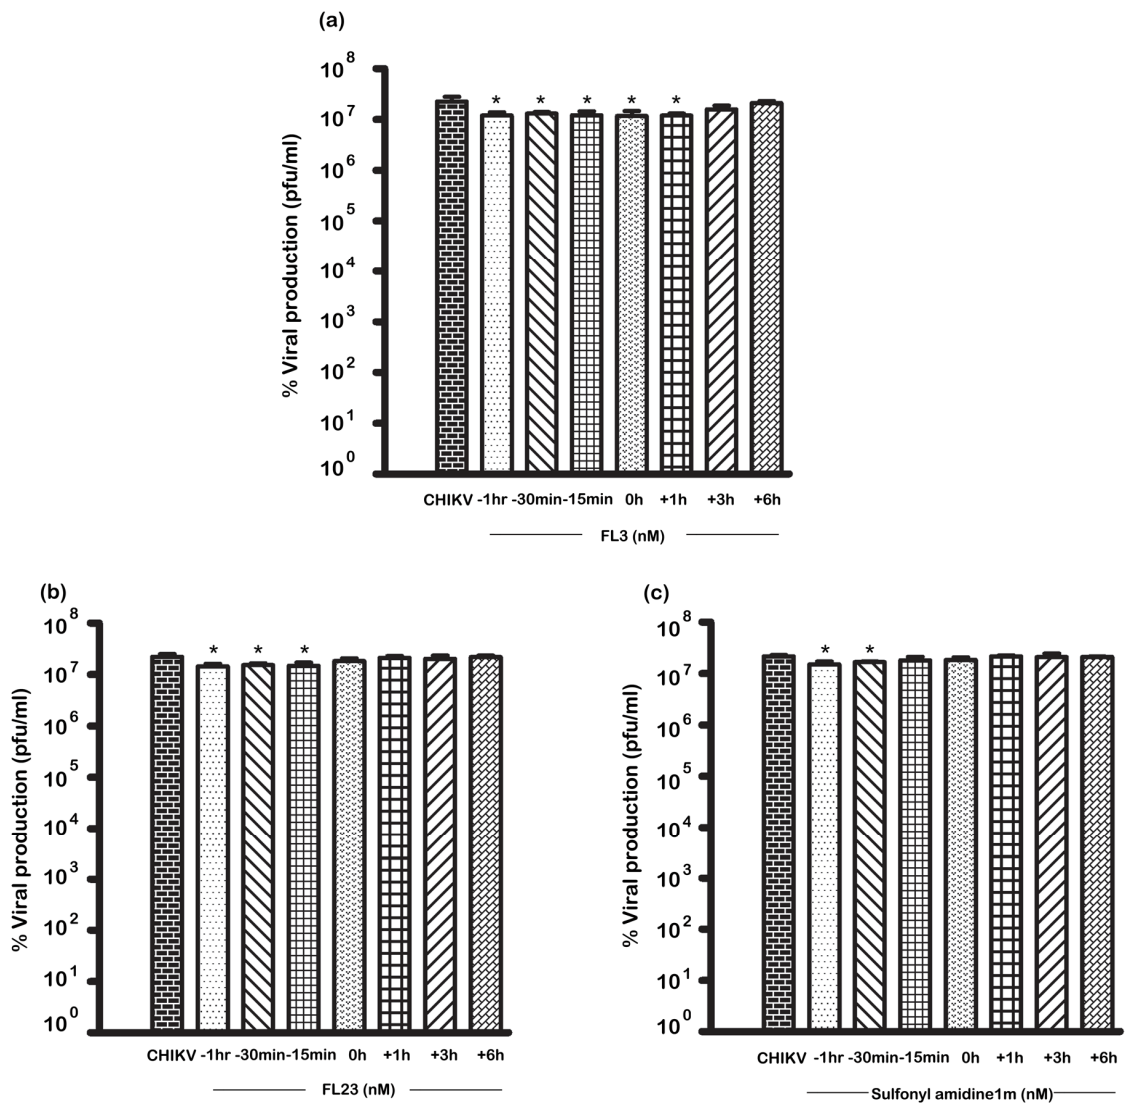

Supplemental Figure 6. Virus production data from Figure 4 plotted as pfu/ml

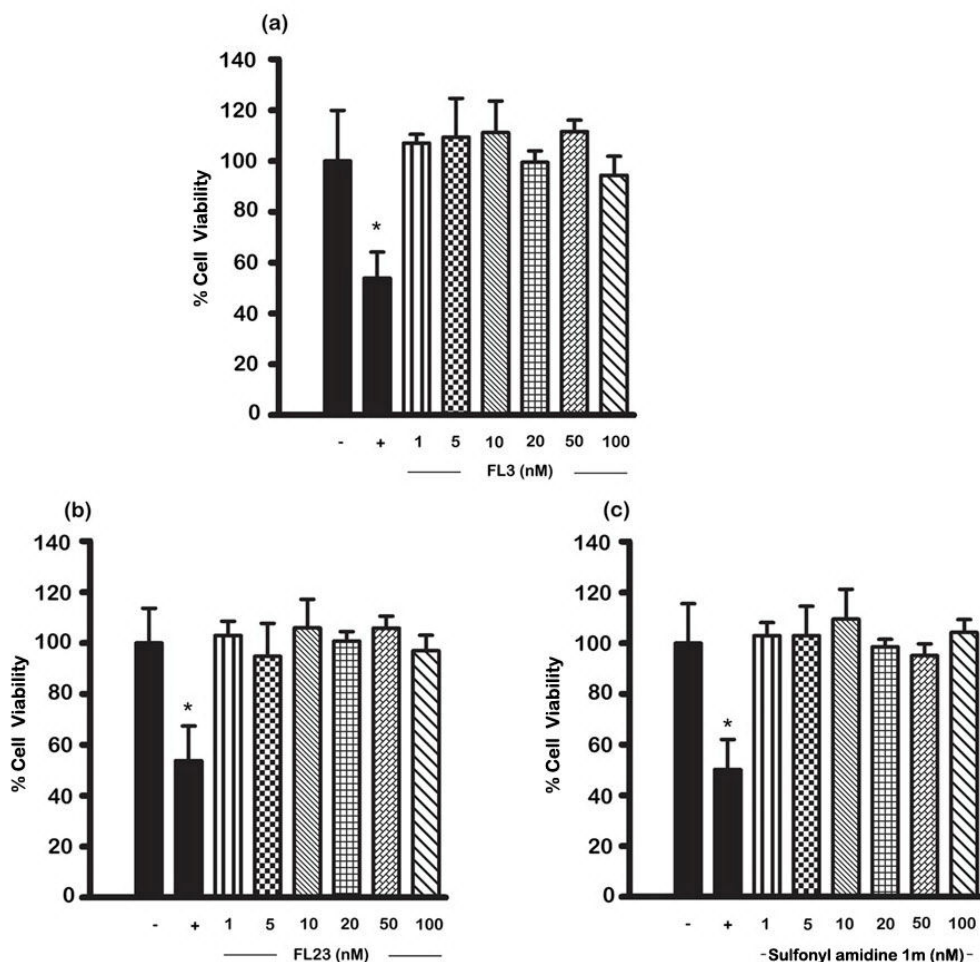

**Supplemental Figure 7.** Determination of cell viability after pulse treatment. Hek293T/17 were incubated with different concentrations of (a) FL3, (b) FL23 or (c) sulfonyl amidine 1m for 15 minutes after which cells were washed and incubated under standard conditions for a further 24 hrs before determination of cell viability using the MTT assay. Data is derived from 8 replicates. Negative (vehicle/DMEM) and positive (5% DMSO) controls were run in parallel. Error bars show S.D. \*P<0.05.

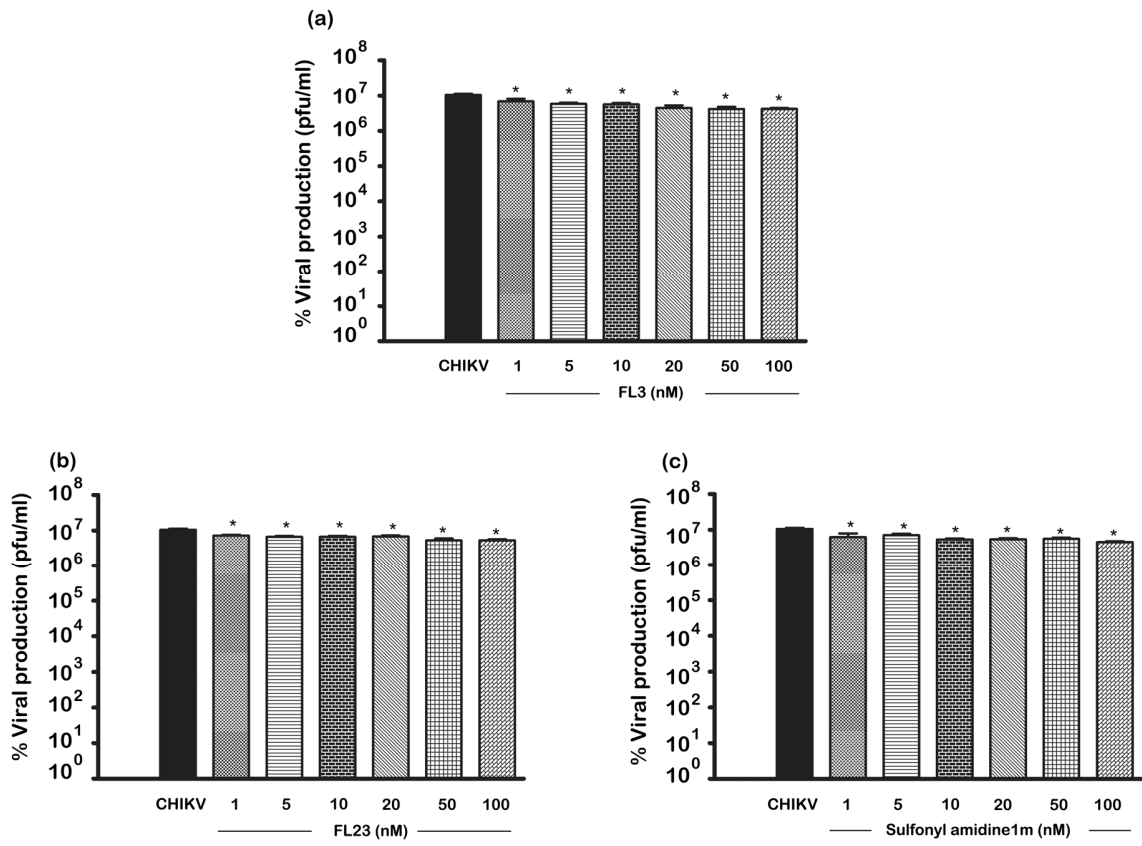

**Supplemental Figure 8.** Virus production data from Figure 5 plotted as pfu/ml
